# Supplementary material
Source: Research Square preprint supplement (doi:10.21203/rs.3.rs-9706931/v1)
Supplement: Supplementary file 1 [file 4064897fcd0c54dd69b8863e.docx]

**Supplementary Appendix 1**

**How the PAC PUF data is collected and the limitations of this data source**

The primary data source was the Medicare Post-Acute Care and Hospice Provider Utilization and Payment Public Use File (PAC PUF). Although the PAC PUF has many utilization data that are comparable across US geographies, it is important to provide details about the underlying data collected and how data were analyzed for this dataset, specifically for the years here analyzed (2013-2022), and any applicable limitations. It is also worth noting that the file only entails Part A Medicare fee-for-service data.

The information reported here is derived from the Methodology document of the PAC PUF files released in 2024 (<https://data.cms.gov/provider-summary-by-type-of-service/medicare-post-acute-care-hospice/medicare-post-acute-care-and-hospice-by-geography-provider>).

Overview of the therapy utilization data collection for the PAC PUF and its limitations

There are differences in the data collection requirements for each type of PAC provider. Also, it is important to note the therapy minutes are not exhaustive relative to those delivered. Overall, caution should be taken when using and comparing utilization rates across provider types. Also, documentation changes for how therapy minutes were recorded occurred in October 2019 (fiscal year 2020) for SNFs. Hence, the data from the PAC PUF cannot be used for assessment of whether therapy utilization rates increased or decreased pre and post 2019. Yet, we establish relative comparisons across geographies (e.g. rural and urban), which are more plausible as the documentation requirements were the same for a given time across the USA. How the data were collected by provider type and any inherent limitations are detailed below.

Data collection for IRFs and its limitations

The PAC PUF calculates the volume (i.e., minutes) of therapy services by discipline type delivered in IRFs from the IRF Patient Assessment Instrument (IRF-PAI). Completion of the IRF-PAI is required for each Medicare patient discharged from an IRF. Questions O0401 and O0402 report the total minutes of therapy delivered by discipline type during the first two weeks of the IRF stay. The therapy minutes patients delivered to patients who had a stay longer than two weeks were not documented, hence not reported across all the IRFs nationwide. In the creation of the PAC PUF IRF files, therapy data are restricted to Medicare FFS beneficiaries and data are aggregated without any adjustment for variations in lengths of stay. For example, a patient with a length-of-stay of 21 days will have therapy minutes data for only 14 days. Thus, there is missing therapy data for patients with stays longer than 14 days. Further, we note that Maryland has adopted an all-payer payment system for their hospitals and some hospital-based units that offer intensive rehabilitation in Maryland do not submit IRF-PAI data, and thus are not included in the PAC PUF data.

Data collection for SNFs and its limitations

The PAC PUF calculates the minutes of therapy services by discipline type delivered in SNFs from the Minimum Data Set 3.0 (MDS). Prior to October 2019 (fiscal year 2020) , MDS Part A assessment question O0400 was used to calculate the volume of therapy services delivered. The response to this question only reports therapy minutes performed in the seven days prior to the assessment. Hence, therapy minutes prior to October 1, 2010 are tied to the 7-day look-back period of each submitted MDS assessment (e.g., 5-day, 14-day, significant change). Since October 1, 2019, the assessment variable (O0425) was used; it reports therapy minutes performed for the entire stay covered by Medicare’s Part A SNF benefit, but this variable is only reported on MDS Part A Discharge assessments, and CMS does not always require a discharge assessment to be completed (e.g., not when the patient dies while at the SNF). Overall, a 13.6% increase in the total number of therapy minutes registered for SNF from 2019 to 2020 was observed, occurring across urban and rural providers, which likely results from this documentation change and not from an increase in therapy hours delivered. Research evidence instead suggests a decline in the actual therapy minutes. See for example: Prusynski RA, Leland NE, Frogner BK, et al. Therapy Staffing in Skilled Nursing Facilities Declined after Implementation of the Patient-Driven Payment Model. J Am Med Dir Assoc 2021;22(10):2201-06. In our study, data across time for SNFs is only used to understand relative gaps between the rural and urban & suburban areas- these geographies were under the same documentation requirements at a given point in time, even though they changed (for both) during that time.

Data collection for HHAs

Services for HH were obtained from the revenue center codes recorded on claims in the Chronic Conditions Data Warehouse and include the following revenue center codes: 0420-0429 (physical therapy), 0430-0439 (occupational therapy), 0440-0449 (speech language pathology). The PAC PUF provides the data in minutes, i.e., transformed from data reported into units of care: each unit = 15 minutes. There were no reported changes in how these data are collected, computed or reported across time.
