# Supplementary material
Source: Research Square preprint supplement (doi:10.21203/rs.3.rs-9706931/v1)
Supplement: Supplementary file 4 [file d46bce5fe3e8c296c128ff11.docx]

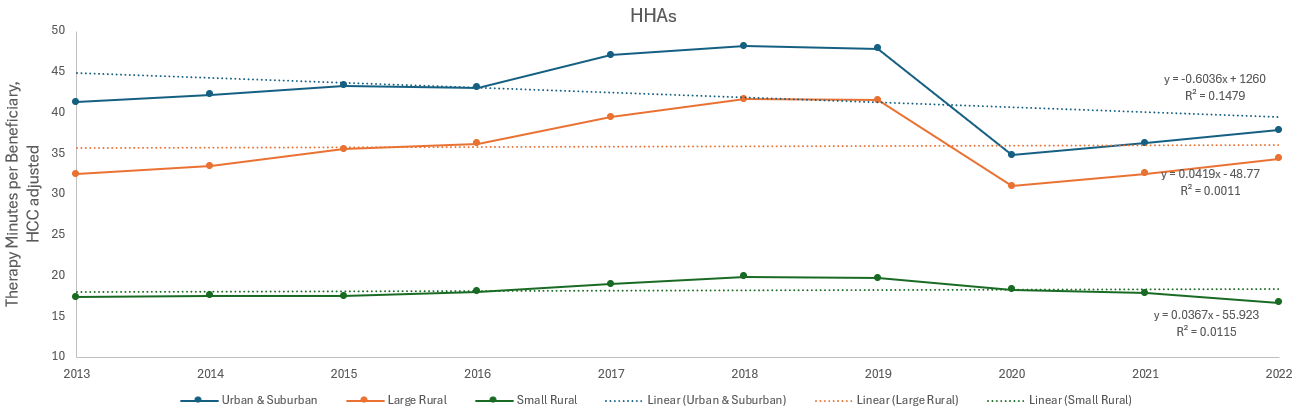


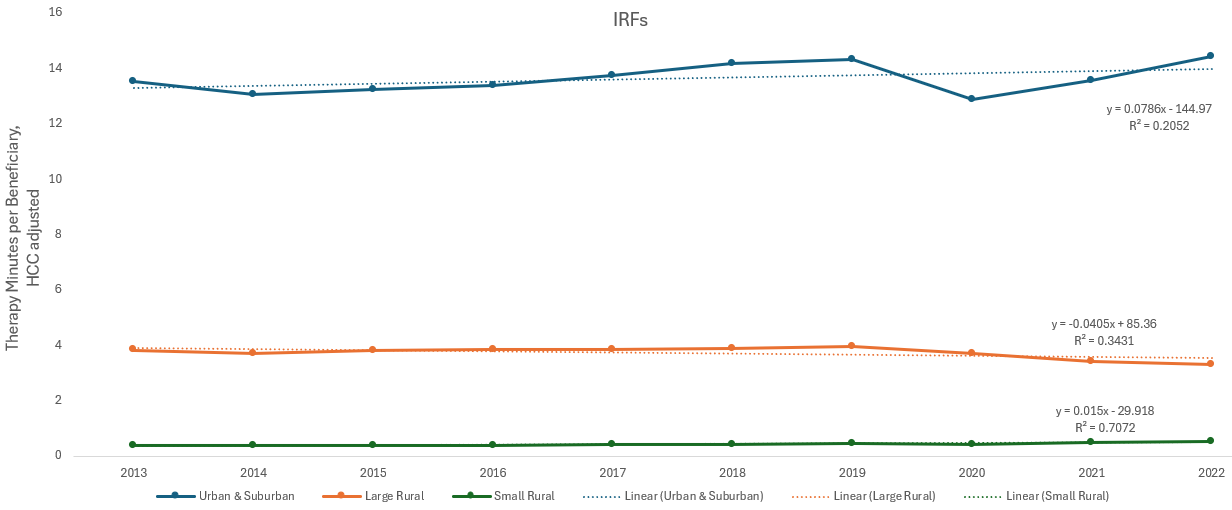


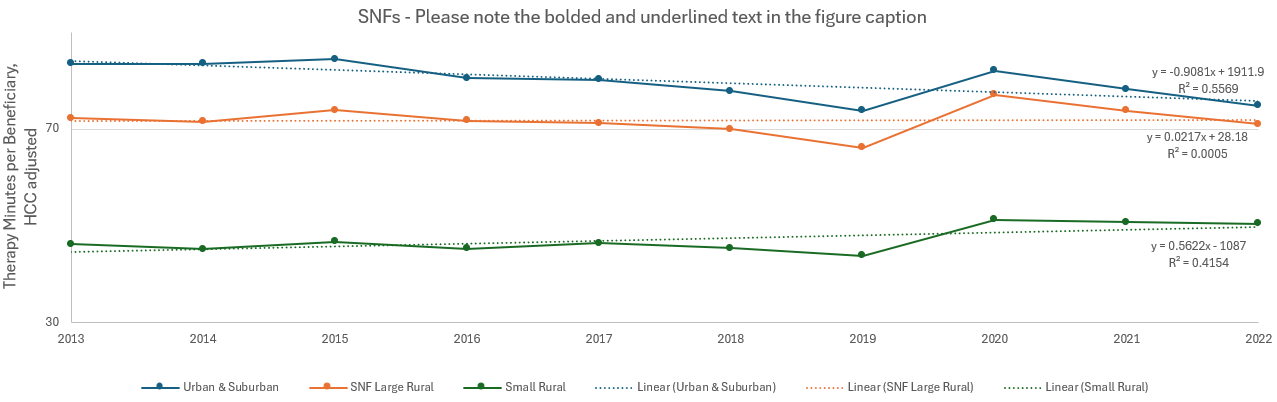


**Supplementary Figure 1:** Time series of the nationwide therapy utilization rate: minutes per fee-for-service Medicare beneficiary, HCC-adjusted (2013-2022), for each provider type, stratified by urban-rural categories, and with the linear regression trendline, equation, and R2 values for each category.

**Note:** **For SNFs**, the increase in documented therapy minutes from 2019 to 2020 onwards, across rural and urban areas, **reflects changes in the documentation requirements** and **should not be understood as an increase in the therapy minutes delivered**; research suggests a decline in the actual therapy minutes. See for example: Prusynski RA, Leland NE, Frogner BK, et al. Therapy Staffing in Skilled Nursing Facilities Declined after Implementation of the Patient-Driven Payment Model. *J Am Med Dir Assoc* 2021;22(10):2201-06. Here the data is shown merely for the purpose of the comparison of the relative differences over time between the rural (especially small rural) and urban & suburban areas.

*Legend*: SNFs: Skilled Nursing Facilities; HHAs: Home Health Agencies; IRFs: Inpatient Rehabilitation Facilities. HCC: Hierarchical Condition Category.
