# Supplementary material
Source: Research Square preprint supplement (doi:10.21203/rs.3.rs-9706931/v1)

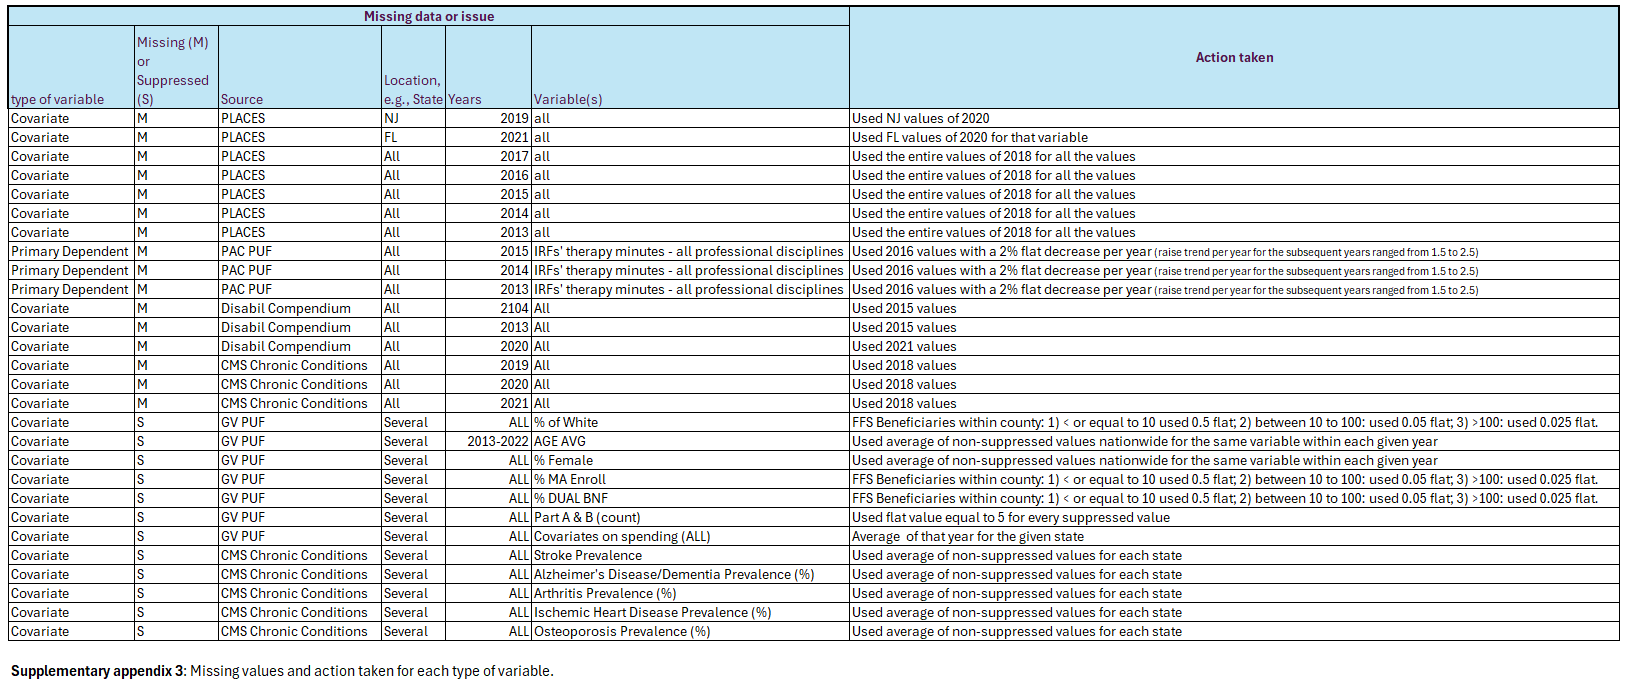

Supplement: Supplementary file 2 [file af5b296986d70233e5cd50cb.docx]
